# Supplementary material for: RareKCNJ18variants do not explain hypokalaemic periodic paralysis in 263 unrelated patients: Table 1
Source: HighWire-hosted journal article supplement (doi:10.1136/jnnp-2014-309293), 2015-04-16

**Supplementary Figure 1S: Lack of segregation in a PP family with KCNJ18-p.R401W.**

Ten affected family members (and one clinically equivocal) are carriers as well as one non-affected relative. In contrast, three affected relatives do not carry R401W.

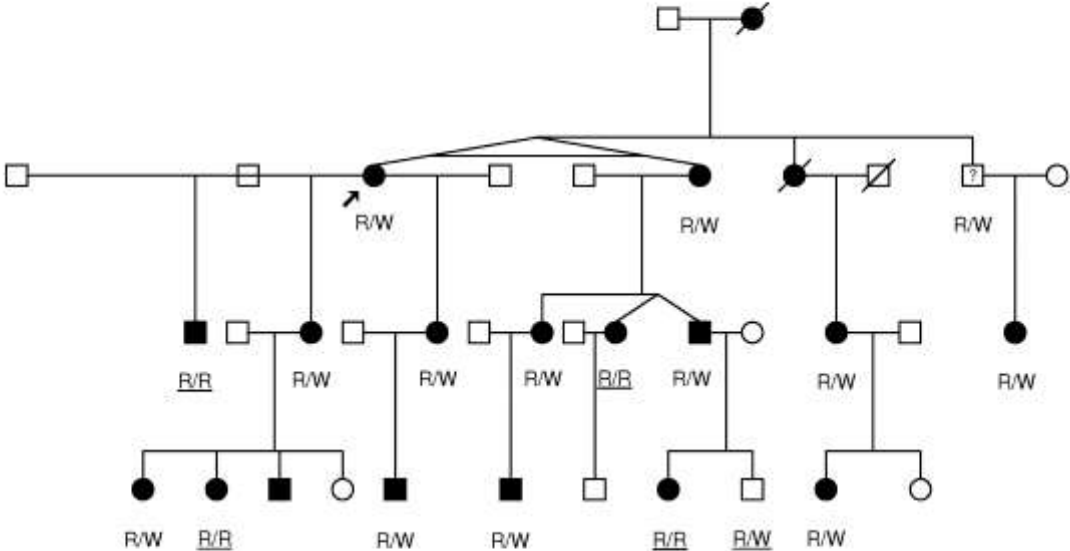

Supplement: jnnp-2014-309293supp.pdf [file jnnp-2014-309293supp.pdf]
